# Supplementary material
Source: PubMed Central journal article supplement (PMC3048891)
Supplement: supp_124_6_940__1.pdf [file supp_124_6_940__1.pdf]

**Table S1. Primer design for cloning**

| <b>Primer Name</b> | <b>5' – 3'</b>                       |
|--------------------|--------------------------------------|
| ZP2IF              | <b>Accttccaacatggcgag</b>            |
| ZP2IR              | <b>ggactgaggaaggcttactgagt</b>       |
| ZP2IIF             | Gagaatcctgccttcccag                  |
| ZP2IIR             | <b>Catctttatatctcacatcag</b>         |
| ZP2IIIR            | Tgatgcagggcaagtcac                   |
| ZP2IVF             | ctgaggagcaaacgagagg                  |
| ZP2IVR             | gactgcagtctctttatttgcaag             |
| VenusF             | Atggtgagcaagggcgag                   |
| VenusR             | ggactgtacagctcgtccat                 |
| NVenIR             | agagccaccgccaccgctggcggtgatatagacgt  |
| NVenIIF            | ggtgggcggtggctctatggtgagcaagggcgag   |
| NVenIIR            | Gtcggcggtgatatagacgt                 |
| CVenF              | gaagcagaagaacggcatca                 |
| CVenR              | gagagccaccgccaccggactgtacagctcgtccat |
| CherryF            | Gatggtgagcaagggcgag                  |
| CherryR            | gcttgtagctcgtccatgc                  |
| ZP3ctZP2F          | Gctagctgagcccagctgta                 |
| ZP3ctZP2R          | Gccttcacagtctggctg                   |
| ZP2ctF             | attattgccaaggatattgcttct             |
| ZP2ctR             | gactgcagtctctttatttgcaag             |
| ZP2ctZP3F          | Gctagcaccttccaacatgg                 |
| ZP2ctZP3R          | cttggtaatctcagagctgctg               |
| ZP3ctF             | Tggactgcttctgctcaaac                 |
| ZP3ctR             | Tgagtttctcttttattgcgga               |
| BTecIF             | <b>gactgtaacttttcttcatatttccg</b>    |
| BTecIR             | <b>Cgctgaggettctgcaaa</b>            |
| BTecIIF            | <b>aatcatgcactccgaataaagc</b>        |
| BTecIIR            | <b>ctacaacacagcccaggctcc</b>         |
| BTecctZP3F         | gctagcgactgtaacttttcttc              |
| BTecctZP3R         | Tgagaagtcacagaggccg                  |
