# Supplementary material
Source: PubMed Central journal article supplement (PMC3048891)
Supplement: supp_124_6_940__2.pdf [file supp_124_6_940__2.pdf]

**Table S2. Primers for site-directed mutagenesis**

| <b>Primer Name</b> | <b>5' – 3'</b>                                   |
|--------------------|--------------------------------------------------|
| ZP2 $\Delta$ TMF   | cagcagctctgagattaccaagtagattattgcccaaggatattgctt |
| ZP2 $\Delta$ TMR   | aagcaatataccttggcaataatctacttggtaatctcagagctgctg |
| ZP2 $\Delta$ CTF   | ttctaggcttcatctgttacctgtagaagaaaagaactataaggtt   |
| ZP2 $\Delta$ CTR   | aaccttatagttcttttcttctacaggtaacagatgaagcctagaa   |
| ZP3 $\Delta$ TMF   | cagactgtggaaggctagactgcttctgctcaa                |
| ZP3 $\Delta$ TMR   | ttgagcagaagcagtctagccttccacagtctg                |
| ZP3 $\Delta$ CTF   | ccctggcagctatagtccttgcttagaccaggaagtgca          |
| ZP3 $\Delta$ CTR   | tgacacttctgggtctaagcaaggactatagctgccaggg         |
